# Supplementary material
Source: PubMed Central journal article supplement (PMC2593085)
Supplement: supp_82_3_193__1.pdf [file supp_82_3_193__1.pdf]

## **ClaSS project economic workstream: systematic review**

### *Search Strategy for systematic review of cost and cost-effectiveness*

**The keyword searching was based on the following strategy (including truncation of terms where appropriate).**

**Chlamydia OR Chlamydia infections OR Chlamydia exp OR pelvic inflammatory disease**

**AND**

**Economics OR economic evaluation OR cost benefit analysis OR cost OR cost analysis OR cost effectiveness analysis OR cost utility analysis OR cost minimisation OR quality of life OR QALY**

**Electronic bibliographic databases searched included the following**

- **MEDLINE**
- **Cumulative Index of Nursing and Allied Health Literature (CINAHL)**
- **EMBASE**
- **Econlit**
- **Science Citation Index (SCI)**
- **Social Science Citation Index (SSCI)**
- **Cochrane Library**
- **Database of Abstracts of Reviews of Effectiveness (DARE)**
- **NHS Economic Evaluation Database**
- **ASSIA**
- **OHE Health Economic Evaluation Database (OHE-IFPMA)**

**To ensure comprehensive coverage of relevant material, additional searches were undertaken, these included;**

- **Citation checking of all articles obtained**
- **Internet searches using the terms Chlamydia or sexually transmitted infection and screening**
- **Conference proceedings and abstracts**
